# Supplementary material for: How percentage‐protected targets can support positive biodiversity outcomes
Source: PubMed Central journal article supplement (PMC9540251; doi:10.1111/cobi.13869), 2022-01-17
Supplement: COBI-36-0-s001.pdf [file COBI-36-0-s001.pdf]

Supporting Information for 'How percentage-protected targets can support positive biodiversity outcomes'.

Carlos Carroll<sup>1</sup>, Reed F. Noss<sup>2</sup>.

1. Klamath Center for Conservation Research, Orleans, CA 95556 USA.
2. Florida Institute for Conservation Science, Melrose, FL 32666 USA.

Supporting Information Table S1. Data and model-based approaches for monitoring achievement of biodiversity outcome goals in relation to percentage-protected targets. See UNEP-WCMC website “Indicators for the post-2020 global biodiversity framework” (<https://www.post-2020indicators.org/>) for further information on several of these metrics and others not listed here.

| <b>Scale of biodiversity</b> | <b>Data source</b>                                                                               | <b>Model</b>                                                                                                                                     | <b>Outcome targets by scale of biodiversity</b>                                                                                                      | <b>Indicators relevant to percentage-protected targets</b>                          | <b>Challenges and limitations</b>                                                                                                   |                                                                                                                          |
|------------------------------|--------------------------------------------------------------------------------------------------|--------------------------------------------------------------------------------------------------------------------------------------------------|------------------------------------------------------------------------------------------------------------------------------------------------------|-------------------------------------------------------------------------------------|-------------------------------------------------------------------------------------------------------------------------------------|--------------------------------------------------------------------------------------------------------------------------|
| 1. Ecosystem                 | Remote sensing of land and climate attributes                                                    | Ecosystem classification <sup>1</sup> , intactness <sup>2</sup> , connectivity <sup>3</sup> , ecosystem process <sup>4</sup> (e.g., disturbance) | Net gain in area of intact ecosystems                                                                                                                | Representation of conservation features within ecoregions <sup>5</sup> , intactness | Heterogeneity within ecoregions, limitations on remotely sensed indicators of ecosystem intactness, ecosystem classification issues |                                                                                                                          |
| 2. Species                   | a. Environmental attributes from remote sensing, ground observations, climate projections, etc.) | Species distribution models (SDM) <sup>6</sup>                                                                                                   | Red List and other expert-based thresholds <sup>7</sup> , species-area relationship <sup>8</sup> , spatially-explicit population models <sup>9</sup> | Reduction in species extinction rate and risk                                       | Hotspots of species richness and endemism, Species Protection Index <sup>10</sup>                                                   | Limitations on explanatory power of SDMs and species-area models, limitations in expert-based extinction risk thresholds |
|                              | b. Monitoring data on species abundance and distribution                                         |                                                                                                                                                  | Red List and other expert-based thresholds <sup>11</sup>                                                                                             | Reduction in species extinction rate and risk                                       | Representation of imperiled species <sup>12</sup>                                                                                   | Limited availability of monitoring data                                                                                  |
| 3. Intraspecific diversity   | Monitoring of species distribution, genetic variation                                            | Ecotype classification <sup>13</sup>                                                                                                             | Retention of existing diversity                                                                                                                      | Representation of ecotypes or other divisions within ranges <sup>14</sup>           | Limited correspondence between environmental attributes and genetic types                                                           |                                                                                                                          |

---

|                           |                                                                  |                                                                                              |                                             |                                                          |                                                               |
|---------------------------|------------------------------------------------------------------|----------------------------------------------------------------------------------------------|---------------------------------------------|----------------------------------------------------------|---------------------------------------------------------------|
| 4. Multi-scale site-based | KBA database <sup>15</sup> , species distribution data or models | Systematic conservation planning <sup>16</sup> , representation (gap) analysis <sup>17</sup> | Multi-scale: No loss of irreplaceable sites | Representation of irreplaceable sites, KBA <sup>18</sup> | KBA database limitations, inconsistencies among SCP processes |
|---------------------------|------------------------------------------------------------------|----------------------------------------------------------------------------------------------|---------------------------------------------|----------------------------------------------------------|---------------------------------------------------------------|

---

Footnotes. 1. Watson et al., 2013; 2. Watson et al., 2018; 3. Saura et al., 2018; Ward et al., 2020; 4. Leroux et al., 2007; 5. Dinerstein et al., 2017; 6. Warren et al., 2018; 7. Allan et al., 2019; 8. Wilson, 2016; 9. Carroll et al., 2006; 10. GEOBON, 2015; 11. Rodrigues et al., 2006; 12. Faith et al., 2008; 13. Hanson et al., 2020; 14. Rochat et al., 2021; 15. Eken et al., 2004; 16. Margules & Pressey, 2000; 17. Rodrigues et al., 2004; 18. Allan et al., 2019; Dinerstein et al., 2020.

## REFERENCES

- Allan, J. R., Possingham, H. P., Atkinson, S. C., Waldron, A., Di Marco, M., Adams, V. M., Butchart, S. H. M., Venter, O., Maron, M., Williams, B. A., Jones, K. R., Visconti, P., Wintle, B. A., Reside, A. E., & Watson, J. E. M. (2019). Conservation attention necessary across at least 44% of Earth's terrestrial area to safeguard biodiversity. *bioRxiv*, 839977. <https://doi.org/10.1101/839977>
- Carroll, C., Phillips, M. K., Lopez-Gonzalez, C. A., & Schumaker, N. H. (2006). Defining Recovery Goals and Strategies for Endangered Species: The Wolf as a Case Study. *BioScience*, *56*(1), 25-37. [https://doi.org/10.1641/0006-3568\(2006\)056\[0025:Drgasf\]2.0.Co;2](https://doi.org/10.1641/0006-3568(2006)056[0025:Drgasf]2.0.Co;2)
- Dinerstein, E., Joshi, A. R., Vynne, C., Lee, A. T. L., Pharend-Deschênes, F., França, M., Fernando, S., Birch, T., Burkart, K., Asner, G. P., & Olson, D. (2020). A "Global Safety Net" to reverse biodiversity loss and stabilize Earth's climate. *Science Advances*, *6*(36), eabb2824. <https://doi.org/10.1126/sciadv.abb2824>
- Dinerstein, E., Olson, D., Joshi, A., Vynne, C., Burgess, N. D., Wikramanayake, E., Hahn, N., Palminteri, S., Hedao, P., Noss, R., Hansen, M., Locke, H., Ellis, E. C., Jones, B., Barber, C. V., Hayes, R., Kormos, C., Martin, V., Crist, E., Sechrest, W., Price, L., Baillie, J. E. M., Weeden, D., Suckling, K., Davis, C., Sizer, N., Moore, R., Thau, D., Birch, T., Potapov, P., Turubanova, S., Tyukavina, A., de Souza, N., Pintea, L., Brito, J. C., Llewellyn, O. A., Miller, A. G., Patzelt, A., Ghazanfar, S. A., Timberlake, J., Klöser, H., Shennan-Farpón, Y., Kindt, R., Lillesø, J.-P. B., van Breugel, P., Graudal, L., Vogé, M., Al-Shammari, K. F., & Saleem, M. (2017). An Ecoregion-Based Approach to Protecting Half the Terrestrial Realm. *BioScience*, *67*(6), 534-545. <https://doi.org/10.1093/biosci/bix014>
- Eken, G., Bennun, L., Brooks, T. M., Darwall, W., Fishpool, L. D. C., Foster, M., Knox, D., Langhammer, P., Matiku, P., Radford, E., Salaman, P., Sechrest, W., Smith, M. L., Spector, S., & Tordoff, A. (2004). Key Biodiversity Areas as Site Conservation Targets. *BioScience*, *54*(12), 1110-1118. [https://doi.org/10.1641/0006-3568\(2004\)054\[1110:Kbaasc\]2.0.Co;2](https://doi.org/10.1641/0006-3568(2004)054[1110:Kbaasc]2.0.Co;2)
- Faith, D. P., Ferrier, S., & Williams, K. J. (2008). Getting biodiversity intactness indices right: ensuring that 'biodiversity' reflects 'diversity'. *Global Change Biology*, *14*(2), 207-217. <https://doi.org/https://doi.org/10.1111/j.1365-2486.2007.01500.x>
- GEOBON. (2015). Global Biodiversity Change Indicators. Version 1.2. *Leipzig: Group on Earth Observations Biodiversity Observation Network Secretariat.*
- Hanson, J. O., Rhodes, J. R., Butchart, S. H. M., Buchanan, G. M., Rondinini, C., Ficetola, G. F., & Fuller, R. A. (2020). Global conservation of species' niches. *Nature*, *580*(7802), 232-234. <https://doi.org/10.1038/s41586-020-2138-7>
- Leroux, S. J., Schmiegelow, F. K. A., Lessard, R. B., & Cumming, S. G. (2007). Minimum dynamic reserves: A framework for determining reserve size in ecosystems structured by large disturbances. *Biological Conservation*, *138*(3), 464-473. <https://doi.org/https://doi.org/10.1016/j.biocon.2007.05.012>
- Margules, C. R., & Pressey, R. L. (2000). Systematic conservation planning [10.1038/35012251]. *Nature*, *405*(6783), 243-253. <http://dx.doi.org/10.1038/35012251>

- Rochat, E., Selmoni, O., & Joost, S. (2021). Spatial areas of genotype probability: Predicting the spatial distribution of adaptive genetic variants under future climatic conditions. *Diversity and Distributions*, *n/a(n/a)*. <https://doi.org/https://doi.org/10.1111/ddi.13256>
- Rodrigues, A. S., Pilgrim, J. D., Lamoreux, J. F., Hoffmann, M., & Brooks, T. M. (2006). The value of the IUCN Red List for conservation. *Trends Ecol Evol*, *21*(2), 71-76.
- Rodrigues, A. S. L., Akçakaya, H. R., Andelman, S. J., Bakarr, M. I., Boitani, L., Brooks, T. M., Chanson, J. S., Fishpool, L. D. C., Da Fonseca, G. A. B., Gaston, K. J., Hoffmann, M., Marquet, P. A., Pilgrim, J. D., Pressey, R. L., Schipper, J., Sechrest, W., Stuart, S. N., Underhill, L. G., Waller, R. W., Watts, M. E. J., & Yan, X. (2004). Global Gap Analysis: Priority Regions for Expanding the Global Protected-Area Network. *BioScience*, *54*(12), 1092-1100. [https://doi.org/10.1641/0006-3568\(2004\)054\[1092:Ggaprf\]2.0.Co;2](https://doi.org/10.1641/0006-3568(2004)054[1092:Ggaprf]2.0.Co;2)
- Saura, S., Bertzky, B., Bastin, L., Battistella, L., Mandrici, A., & Dubois, G. (2018). Protected area connectivity: Shortfalls in global targets and country-level priorities. *Biological Conservation*, *219*, 53-67. <https://doi.org/https://doi.org/10.1016/j.biocon.2017.12.020>
- Ward, M., Saura, S., Williams, B., Ramírez-Delgado, J. P., Arafeh-Dalmau, N., Allan, J. R., Venter, O., Dubois, G., & Watson, J. E. M. (2020). Just ten percent of the global terrestrial protected area network is structurally connected via intact land. *Nat Commun*, *11*(1), 4563.
- Warren, R., Price, J., Graham, E., Forstenhaeusler, N., & VanDerWal, J. (2018). The projected effect on insects, vertebrates, and plants of limiting global warming to 1.5°C rather than 2°C. *Science*, *360*(6390), 791-795. <https://doi.org/10.1126/science.aar3646>
- Watson, J. E. M., Evans, T., Venter, O., Williams, B., Tulloch, A., Stewart, C., Thompson, I., Ray, J. C., Murray, K., Salazar, A., McAlpine, C., Potapov, P., Walston, J., Robinson, J. G., Painter, M., Wilkie, D., Filardi, C., Laurance, W. F., Houghton, R. A., Maxwell, S., Grantham, H., Samper, C., Wang, S., Laestadius, L., Runting, R. K., Silva-Chávez, G. A., Ervin, J., & Lindenmayer, D. (2018). The exceptional value of intact forest ecosystems. *Nature Ecology & Evolution*, *2*(4), 599-610. <https://doi.org/10.1038/s41559-018-0490-x>
- Watson, J. E. M., Iwamura, T., & Butt, N. (2013). Mapping vulnerability and conservation adaptation strategies under climate change. *Nature Climate Change*, *3*(11), 989-994. <https://doi.org/10.1038/nclimate2007>
- Wilson, E. O. (2016). *Half-earth: our planet's fight for life*. WW Norton & Company.
